# Supplementary material
Source: publisher site journal article supplement (https://www.spandidos-publications.com/5737/downloadSupplementary)
Supplement: Supplementary file 1 [file downloadSupplementary]

## Sheet: Sheet1
Table SI. Merged sets of ferroptosis-related genes
Genes
RPL8
IREB2
ATP5MC3
CS
EMC2
ACSF2
NOX1
CYBB
NOX3
NOX4
NOX5
DUOX1
DUOX2
G6PD
PGD
VDAC2
PIK3CA
FLT3
SCP2
TP53
ACSL4
LPCAT3
NRAS
KRAS
HRAS
TF
TFRC
TFR2
SLC38A1
SLC1A5
GLS2
GOT1
CARS1
ALOX5
KEAP1
HMOX1
ATG5
ATG7
NCOA4
ALOX12
ALOX12B
ALOX15
ALOX15B
ALOXE3
PHKG2
ACO1
G6PDX
ULK1
ATG3
ATG4D
BECN1
MAP1LC3A
GABARAPL2
GABARAPL1
ATG16L1
WIPI1
WIPI2
SNX4
ATG13
ULK2
SAT1
EGFR
MAPK3
MAPK1
BID
ZEB1
DPP4
CDKN2A
PEBP1
SOCS1
CDO1
MYB
MAPK8
MAPK9
CHAC1
MAPK14
LINC00472
PRKAA2
PRKAA1
ELAVL1
BAP1
ABCC1
MIR6852
ACVR1B
TGFBR1
EPAS1
HILPDA
HIF1A
IFNG
ANO6
LPIN1
HMGB1
TNFAIP3
TLR4
ATF3
ATM
YY1AP1
EGLN2
MIOX
TAZ
MTDH
IDH1
SIRT1
FBXW7
PANX1
DNAJB6
BACH1
LONP1
CD82
IL1B
CTSB
POR
CYB5R1
ELOVL5
FADS1
FBW7
PTEN
NR1D1
NR1D2
TBK1
IL6
USP7
miR-182-5p
miR-378a-3p
ATF4
AQP3
AQP5
AQP8
LINC00618
MT1DP
PEX10
AGPAT3
PEX12
CHP1
GPAT4
BRPF1
OSBPL9
INTS2
MMD
CYP4F8
MLLT1
TTPA
GRIA3
EPT1
POM121L12
LIG3
AEBP2
AGPS
CDCA3
PEX2
PEX6
TIMM9
DCAF7
LCE2C
FAR1
PHF21A
SMAD7
LYRM1
AMN
PEX3
MTCH1
ACADSB
PVT1
hsa_circ_0008367
SLC39A14
MAP3K11
GSK3B
BRD7
SLC25A28
MFN2
SLC11A2
ZFAS1
TSC1
TGFB1
SNCA
SIRT3
CGAS
STING1
HDDC3
MIR761
MDM2
MDM4
MIR214
DLD
WWTR1
PRKCA
SLC7A11
GPX4
AKR1C1
AKR1C2
AKR1C3
RB1
HSPB1
HSF1
GCLC
NFE2L2
SQSTM1
NQO1
FTH1
MUC1
SLC3A2
MT1G
SLC40A1
CISD1
FANCD2
FTMT
HSPA5
HELLS
SCD
FADS2
SRC
STAT3
PML
MTOR
NFS1
TP63
CDKN1A
MIR137
ENPP2
FH
CISD2
MIR9-1
MIR9-2
MIR9-3
CBS
ISCU
ACSL3
OTUB1
CD44
LINC00336
BRD4
PRDX6
MIR17
SESN2
NF2
ARNTL
JUN
CA9
TMBIM4
PLIN2
MIR212
Fer1HCH
AIFM2
LAMP2
ZFP36
PROM2
CHMP5
CHMP6
CAV1
GCH1
DAZAP1
PIR
FTL
HCAR1
SLC16A1
RRM2
NR4A1
RPTOR
SREBF1
SREBF2
FZD7
P4HB
NT5DC2
BCAT2
PLA2G6
MIR424
PARK7
FXN
SUV39H1
ATF2
ACOT1
ALDH3A2
STK11
FNDC5
CircIL4R
CDH1
NEDD4L
BRD2
BRD3
BRDT
DECR1
GLRX5
NCOA3
NR5A2
PANX2
RHEBP1
TFAP2A
CP
ARF6
GDF15
ABHD12
PPP1R13L
TFAM
KDM3B
RNF113A
AHCY
circ-TTBK2
MIR522
IDH2
PPARA
NOS2
SIAH2
RELA
VDR
NEDD4
PRDX1
AR
MTF1
PTGS2
DUSP1
NCF2
MT3
UBC
ALB
TXNRD1
SRXN1
GPX2
BNIP3
OXSR1
SELENOS
ANGPTL7
DDIT4
LOC284561
ASNS
TSC22D3
DDIT3
JDP2
SLC1A4
PCK2
TXNIP
VLDLR
GPT2
PSAT1
LURAP1L
SLC7A5
HERPUD1
XBP1
ZNF419
KLHL24
TRIB3
ZFP69B
ATP6V1G2
VEGFA
TUBE1
ARRDC3
CEBPG
SNORA16A
RGS4
BLOC1S5-TXNDC5
LOC390705
EIF2S1
KIM-1(HAVCR1)
CXCL2
HSD17B11
SETD1B
MAFG
IL33
HAMP
STEAP3
DRD5
DRD4
MAP3K5
SLC2A1
SLC2A3
SLC2A6
SLC2A8
SLC2A12
GLUT13
SLC2A14
EIF2AK4
TFAP2C
SP1
HBA1
NNMT
PLIN4
HIC1
STMN1
CAPG
HNF4A
NGB
YWHAE
GABPB1
AURKA
MIR4715
RIPK1
MIR30B
MMP13
LRRFIP1
